# Supplementary material for: RIG-I-based immunotherapy enhances survival in preclinical AML models and sensitizes AML cells to checkpoint blockade
Source: Springer Nature journal article supplement (doi:10.1038/s41375-019-0639-x), 2019-11-18
Supplement: MOESM3 [file 41375_2019_639_MOESM3_ESM.pdf › 41375_2019_639_MOESM3_ESM.pdf]

**Table S1. Clinical characteristics of AML patients and cell lines**

| Sample             | Disease Stage* | Age* [Years] | Sex | Cytogenetics                 | Mutations#                                    |
|--------------------|----------------|--------------|-----|------------------------------|-----------------------------------------------|
| <b>PDX-Samples</b> |                |              |     |                              |                                               |
| <b>AML-372</b>     | R1             | 47           | f   | KMT2A-AF10                   | BCOR, KRAS                                    |
| <b>AML-388</b>     | ID             | 57           | m   | KMT2A-AF6                    | CDKN2A, CEBPZ, KRAS                           |
| <b>AML-491</b>     | R1             | 53           | f   | del(7)(q2?1)                 | BCOR, DNMT3A, ETV6, KRAS, NRAS, PTPN11, RUNX1 |
| <b>AML-896</b>     | ID             | 52           | f   | CN                           | ASXL2, DNMT3A, FLT3-ITD, IDH2, NPM1           |
| <b>AML-981</b>     | R1             | 71           | m   | CN                           | ASXL1, DNMT3A, FLT3-ITD, FLT3-TKD, NPM1, TET2 |
| <b>Cell Lines§</b> |                |              |     |                              |                                               |
| <b>MV4-11</b>      |                | m            | 10  | Hyperdiploid, KMT2A-AFF1     | FLT3-ITD                                      |
| <b>OCI-AML-3</b>   | ID             | m            | 57  | Hyperdiploid                 | DNMT3A, NPM1                                  |
| <b>MOLM-13</b>     | R1             | m            | 20  | Hyperdiploid, KMT2A-MLLT3    | FLT3-ITD                                      |
| <b>PL-21</b>       |                | m            | 24  | Hypertetraploid              | FLT3-ITD                                      |
| <b>THP-1</b>       | R1             | m            | 1   | Near-Tetraploid, KMT2A-MLLT3 |                                               |

\*when the primary AML sample was obtained; #targeted resequencing of patient cells and PDX cells, for PDX cells only!; §Information from DSMZ; ID = initial diagnosis; R1 = 1st relapse; f = female; m = male; del = deletion; CN = normal karyotype

## Reference

- 1 Metzeler KH, Herold T, Rothenberg-Thurley M, Amler S, Sauerland MC, Gorlich D *et al.* Spectrum and prognostic relevance of driver gene mutations in acute myeloid leukemia. *Blood* 2016; **128**: 686–698.

**Table S2. FACS antibodies used in this study**

| <b>Target/Stain</b>      | <b>Fluorochrome</b> | <b>Vendor</b>            | <b>Catalog Number</b> |
|--------------------------|---------------------|--------------------------|-----------------------|
| anti-human CD3           | Pacific Blue        | BioLegend                | 300431                |
| anti-human CD3           | FITC                | BioLegend                | 300406                |
| anti-human CD8           | APC                 | Miltenyi Biotec          | 130110679             |
| anti-human CD33          | APC                 | BioLegend                | 366605                |
| anti-human CD45          | FITC                | BioLegend                | 368508                |
| anti-human PD-L1         | PE/Cy7              | BioLegend                | 329717                |
| anti-mouse CD45          | Pacific Blue        | BioLegend                | 103126                |
| anti-mouse CD45          | PerCP               | BioLegend                | 103130                |
| anti-mouse CD3e          | APC                 | BioLegend                | 100312                |
| anti-mouse CD4           | PE                  | BD Bioscience            | 553730                |
| anti-mouse CD4           | PE/Cy7              | BioLegend                | 100528                |
| anti-mouse CD8a          | APC                 | BD Bioscience            | 553035                |
| anti-mouse CD8           | PE                  | BioLegend                | 100708                |
| anti-mouse NK1.1         | PerCP               | BioLegend                | 108726                |
| anti-mouse CD274 (PD-L1) | PE/Cy7              | BioLegend                | 124314                |
| anti-mouse CD19          | PE                  | BioLegend                | 115508                |
| anti-mouse CD45          | Alexa-Fluor 700     | BioLegend                | 103128                |
| mouse IgG1, κ            | APC                 | BioLegend                | 400120                |
| mouse IgG1, κ            | FITC                | BD Bioscience            | 555748                |
| mouse IgG1, κ            | Pacific Blue        | BioLegend                | 400151                |
| mouse IgG2a, κ           | APC                 | BioLegend                | 400220                |
| mouse IgG2a, κ           | PerCP               | BioLegend                | 400256                |
| rat IgG2a, κ             | PE                  | BioLegend                | 400507                |
| rat IgG2a, κ             | PE/Cy7              | BioLegend                | 400522                |
| rat IgG2b, κ             | PE/Cy7              | BioLegend                | 400618                |
| rat IgG2b, κ             | PerCP               | BioLegend                | 400629                |
| Fixable Viability Dye    | eFluor 780          | Thermo Fisher Scientific | 65-0865-14            |
| To-Pro 3 Iodide          |                     | Invitrogen               | T3605                 |
| Anti-human CD45          | BV 785              | BioLegend                | 304048                |
| Anti-human HLA-A, B, C   | Alexa-Fluor 488     | BioLegend                | 311413                |
| Anti-human Fas (DX2)     | PE/Cy7              | BioLegend                | 305622                |
| Anti-human PD-L1         | APC                 | BioLegend                | 329708                |
| Annexin V                | FITC                | Immuntotools             | 31490013              |
